# Supplementary material for: A chemokine regulatory loop induces cholesterol synthesis in lung-colonizing triple-negative breast cancer cells to fuel metastatic growth
Source: PubMed Central journal article supplement — Mol Ther. 2021 Jul 16;30(2):672–87. doi: 10.1016/j.ymthe.2021.07.003 (PMC8821896; doi:10.1016/j.ymthe.2021.07.003), 2021-07-16
Supplement: mmc1.pdf [file mmc1.pdf]

## **Supplemental Information**

### **A chemokine regulatory loop induces cholesterol synthesis in lung-colonizing triple-negative breast cancer cells to fuel metastatic growth**

**Bingchen Han, Felix Alonso-Valenteen, Zhe Wang, Nan Deng, Tian-Yu Lee, Bowen Gao, Ying Zhang, Yali Xu, Xinfeng Zhang, Sandrine Billet, Xuemo Fan, Stephen Shiao, Neil Bhowmick, Lali Medina-Kauwe, Armando Giuliano, and Xiaojiang Cui**

## Supplementary Materials for

A Lung Fibroblast-mediated Chemokine-loop Induces Cholesterol Synthesis in Lung-colonizing Triple-negative Breast Cancer Cells to Drive Metastatic Growth

Bingchen Han, Felix Alonso-Valenteen, Zhe Wang, Nan Deng, Tian-Yu Lee, Bowen Gao, Ying Zhang, Yali Xu, Xinfeng Zhang, Sandrine Billet, Xuemo Fan, Stephen Shiao, Neil Bhowmick, Lali Medina-Kauwe, Armando Giuliano, Xiaojiang Cui

Correspondence to: [Xiaojiang.cui@chshs.org](mailto:Xiaojiang.cui@chshs.org) and [Bingchen.han@chshs.org](mailto:Bingchen.han@chshs.org)

### **This PDF file includes:**

Figures. S1 to S5

Tables S1 to S3

**Figure. S1.**

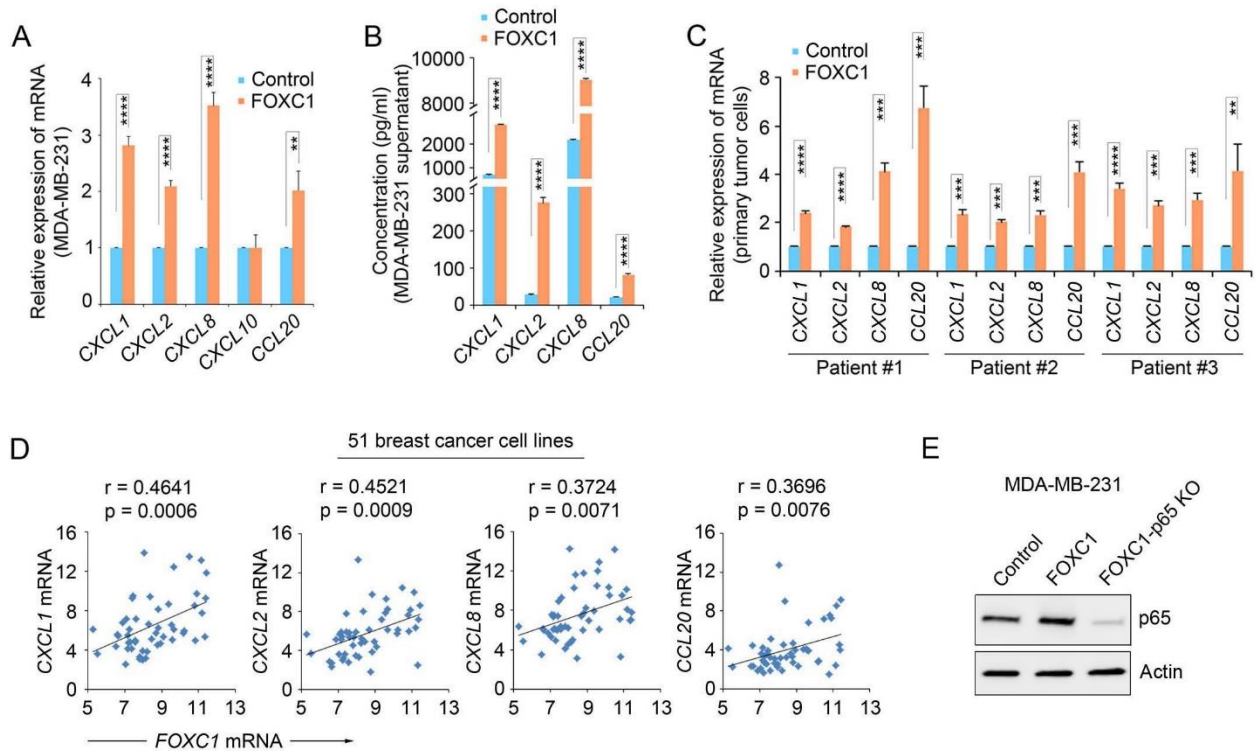

**Figure S1.** Chemokines CXCL1/2/8 and CCL20 are upregulated in TNBC.

**A**, real-time RT-PCR analysis of *CXCL1/2/8/10*, and *CCL20* in control and FOXC1-overexpressing MDA-MB-231 cells. **B**, ELISA of the *CXCL1/2/8*, and *CCL20* levels in the supernatant of control and FOXC1-overexpressing MDA-MB-231 cells. **C**, real-time RT-PCR analysis of *CXCL1/2/8*, and *CCL20* in primary tumor cells of three TNBC patients. **D**, Pearson correlation analysis between *FOXC1* and *CXCL1/2/8*, or *CCL20* mRNA levels in 51 human breast cancer cell lines (include luminal A, luminal B, HER2-enriched, basal-like, and normal-like molecular subtypes). **E**, western blotting of p65 protein in p65 wildtype and p65 KO MDA-MB-231 cells. Actin was used as control. The bar graph indicates mean  $\pm$  SD (n = 3). \*\* p<0.01, \*\*\* p<0.001, \*\*\*\* p<0.0001.

**Figure S2.**

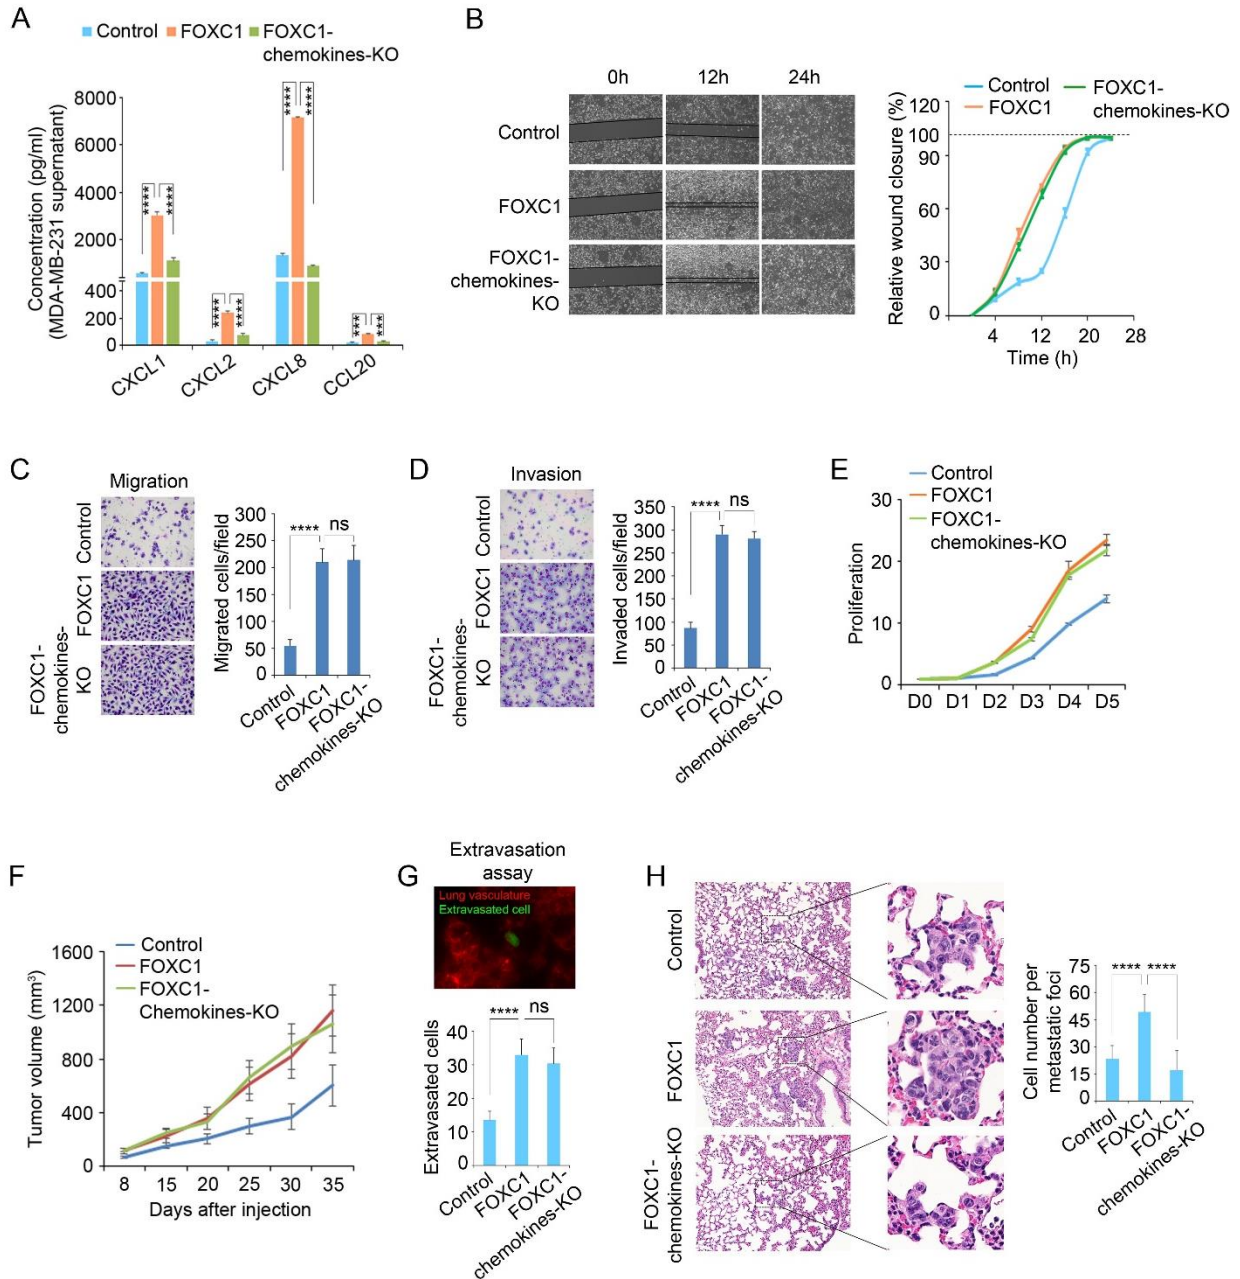

**Figure S2. CXCL1/2/8 promote lung metastasis of TNBC cells.**

**A**, ELISA analysis of the CXCL1/2/8 and CCL20 levels in the supernatant of different MDA-MB-231 sublines. **B-E**, wound healing (**B**), migration (**C**), invasion (**D**), and proliferation (**E**) assays of different MDA-MB-231 sublines. **F**, orthotopic xenograft models to evaluate the growth

capacities of different MDA-MB-231 mammary tumors. **G**, extravasation assays of different MDA-MB-231 sublines injected via mouse tail vein. Representative image shows the migrated cancer cell and the lung vasculature, which were labeled by CellTracker Green CMFDA and rhodamine-lectin, respectively. Magnification, 400×. The bar graph indicates mean  $\pm$  SD (n = 5 slides). **H**, outgrowth of different MDA-MB-231 sublines in lung tissue.  $0.5 \times 10^6$  cells were injected into mice through the tail vein. Lungs were collected 5 days after injection and sectioned followed by hematoxylin-eosin (HE) staining. Cell numbers of each metastatic foci were counted. The bar graph indicates mean  $\pm$  SD (n = 10 foci. Two representative images were analyzed from each mouse, five mice were examined). \*\*\*,  $p < 0.001$ , \*\*\*\*,  $p < 0.0001$ .

**Figure S3.**

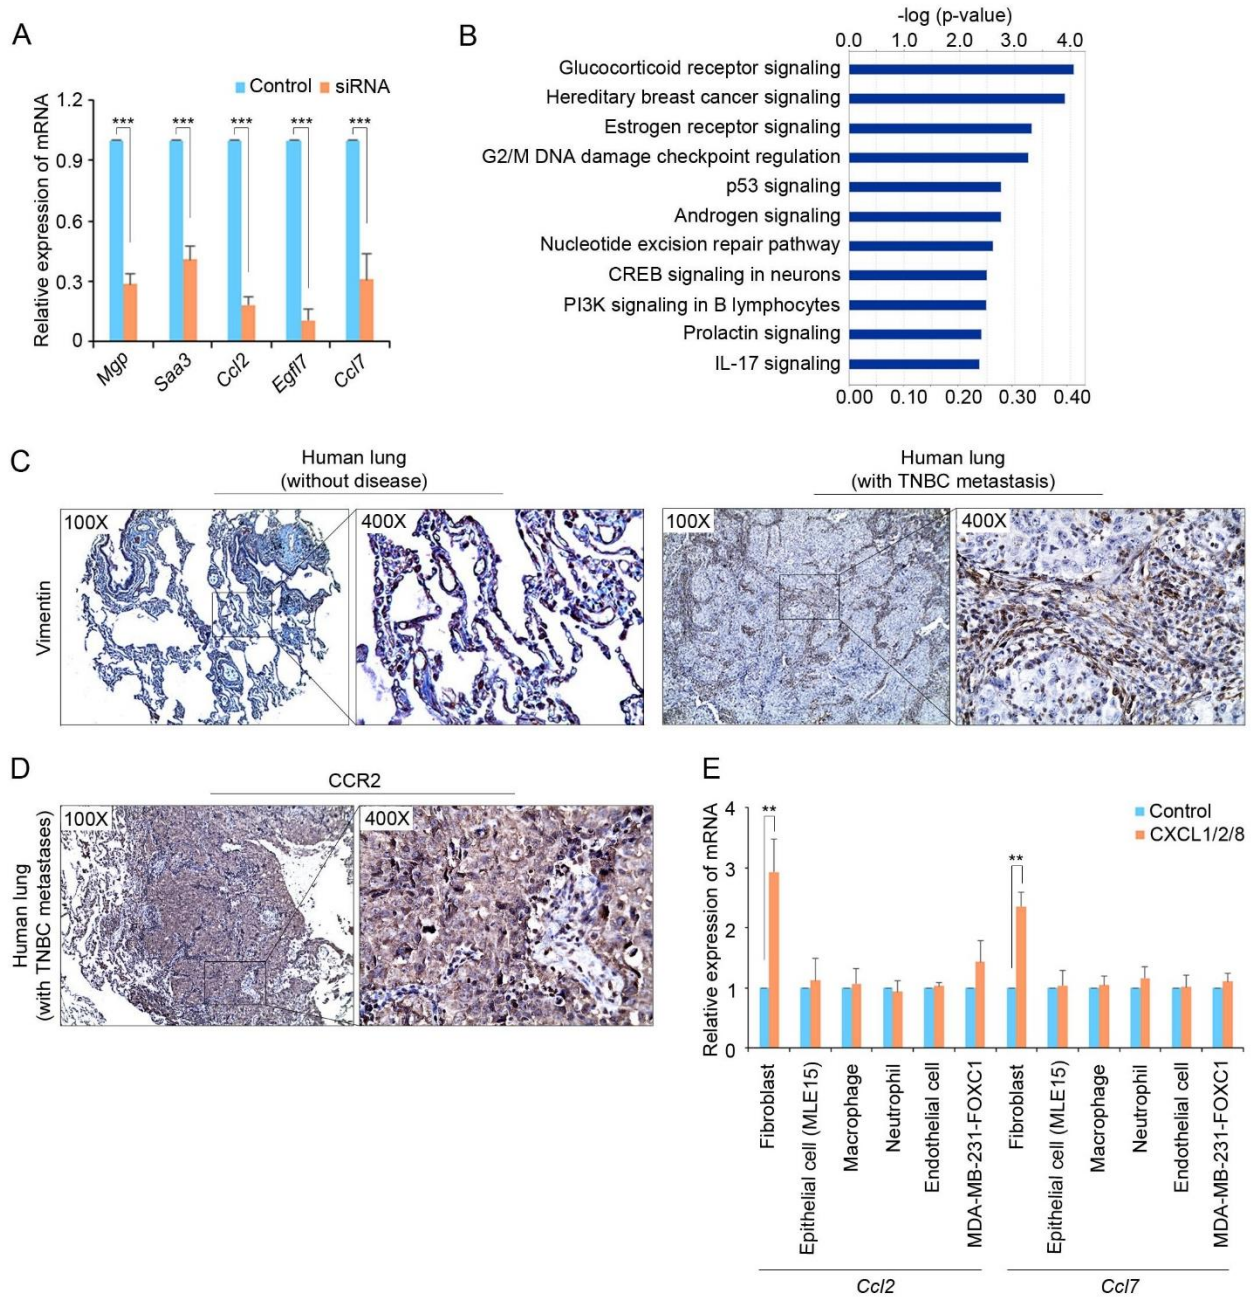

**Figure S3.** Lung fibroblasts increase CCL2/7 expression during TNBC lung metastasis formation.

**A**, real-time RT-PCR assays to confirm the siRNA-mediated knockdown of different genes in

isolated mouse lung fibroblasts. **B**, gene ontology (GO) analysis of the upregulated genes. RNA-

Seq experiments were performed in control and recombinant human CXCL1(8 nM)/2(2 nM)/8(20 nM) proteins-treated mouse lung fibroblasts. **C**, immunohistochemistry (IHC) staining of Vimentin in normal human lungs and lungs with TNBC metastases. **D**, IHC assay of CCR2 staining in human lungs with TNBC metastases. **E**, real-time RT-PCR assays of *Ccl2/7* mRNAs expression in lung fibroblasts, immortalized mouse lung epithelial cells (MLE15), macrophages, neutrophils, endothelial cells, and MDA-MB-231-FOXC1 cells. The bar graph indicates mean  $\pm$  SD (n = 3). \*\* p<0.01, \*\*\*, p<0.001.



**Figure. S4.**

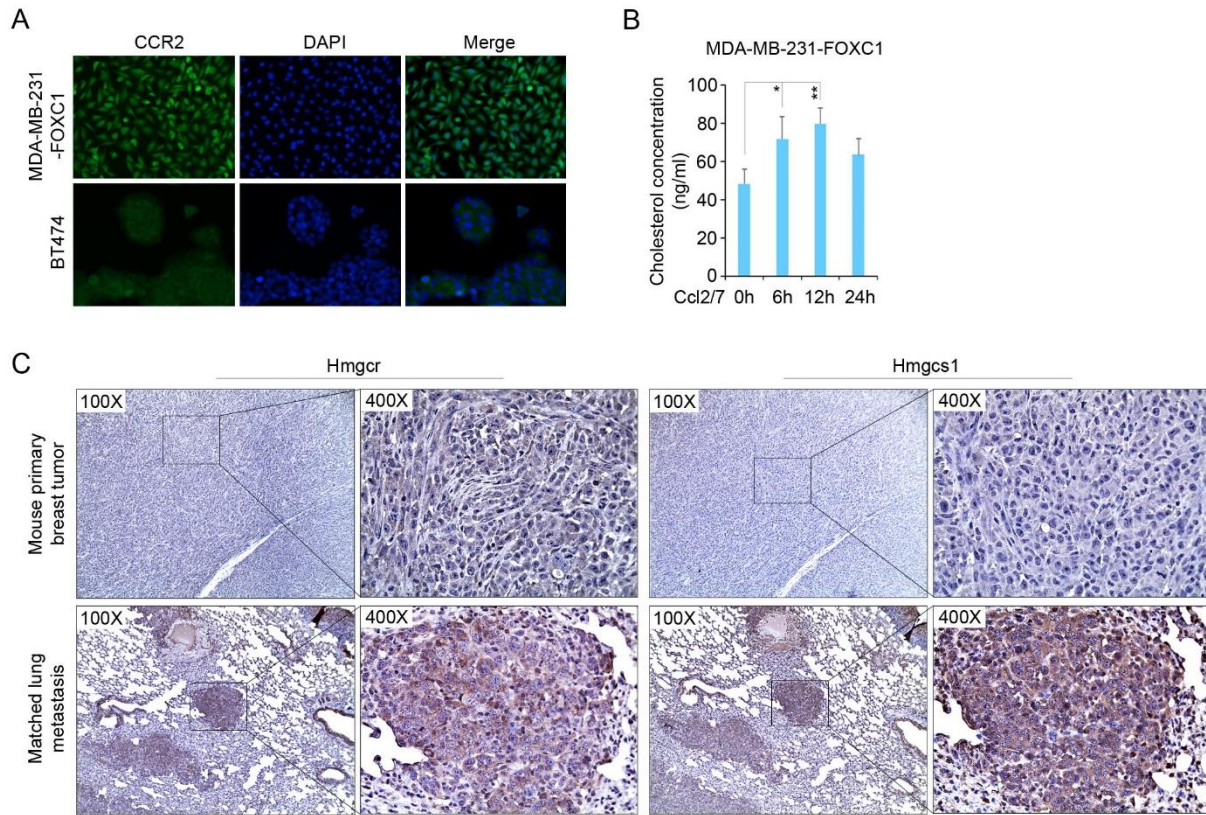

**Figure S4.** Lung fibroblast-derived CCL2/7 stimulate cholesterol synthesis in the lung-colonizing TNBC cells.

**A**, immunofluorescence staining of CCR2 in FOXC1-overexpressing MDA-MB-231 cells. BT474 cells expressing lower level of CCR2 were used as a control. Magnification, 200 $\times$ . **B**, ELISAs of cholesterol concentrations in the supernatant of mouse Ccl2(10 nM)/7(50 nM)-treated FOXC1-overexpressing MDA-MB-231 cells at different timepoints. **C**, IHC of Hmgcr and Hmgcs1 in mouse 4T1 primary breast tumors and matched lung metastases. The bar graph indicates mean  $\pm$  SD (n = 3). \* p<0.05, \*\* p<0.01.



**Figure S5.**

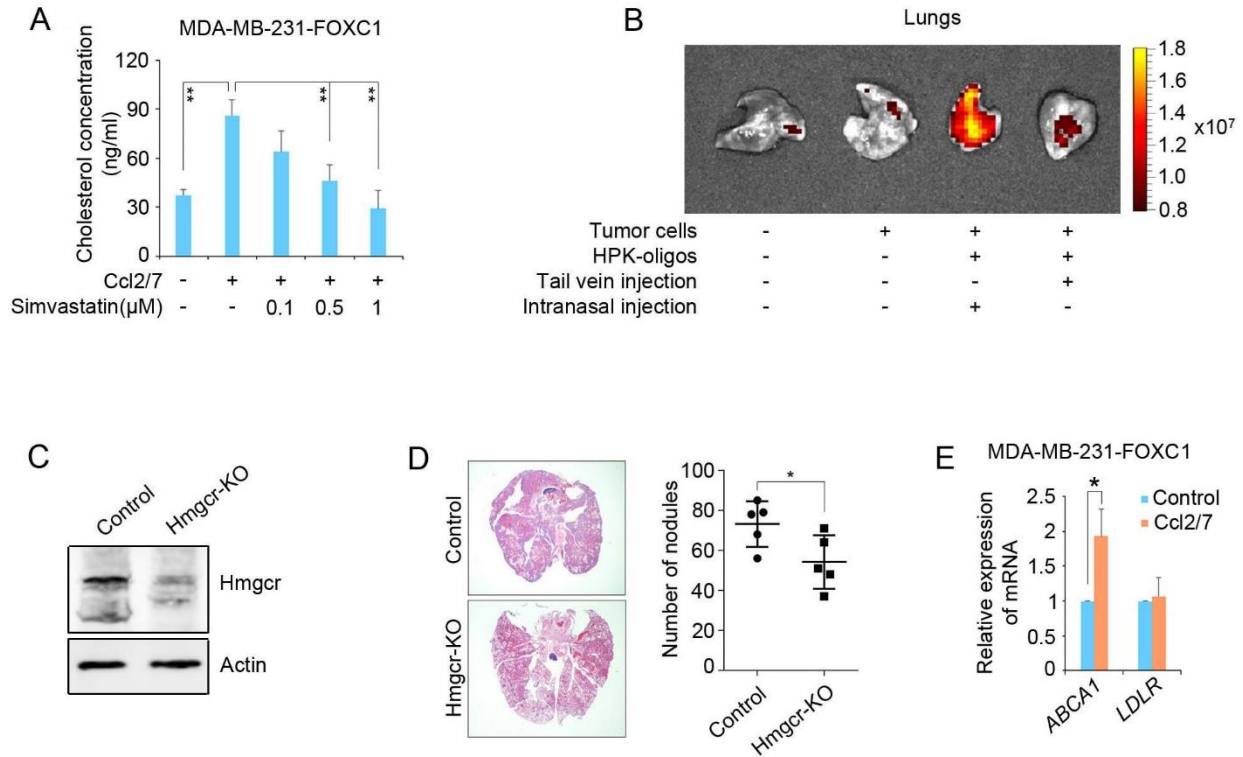

**Figure S5.** Targeting cholesterol synthesis in lung-colonizing TNBC cells to inhibit lung metastasis formation.

**A**, ELISA of cholesterol concentrations in the supernatant of FOXC1-overexpressing MDA-MB-231 cells treated with simvastatin. **B**, evaluation of the targeted delivery of nanoparticle HPK to mouse lung tissue.  $0.5 \times 10^6$  4T1 cells were injected into BALB/c wild-type mice through the tail vein. After 48 hours,  $1.5 \mu\text{g}$  HPK-oligo (Alexa Fluor 680-conjugated) were administered into mice intranasally or through the tail vein. Mouse lungs were collected 3 hours after the delivery and scanned by the IVIS Lumina XR *in vivo* imaging system. **C**, western blotting to confirm Hmgcr knockout in 4T1 cells. Actin was used as control. **D**, syngeneic mouse models to evaluate lung metastasis formation capacity.  $0.5 \times 10^6$  control or Hmgcr-KO 4T1 cells were injected into mice through the tail vein ( $n = 5$ ). Mouse lungs were collected 2 weeks after the injections. Metastatic

nodules were counted (right panel) and lung sections were stained by HE (left panel). E, real-time RT-PCR analysis of *ABCA1* and *LDLR* in Ccl2/7-treated MDA-MB-231-FOXC1 cells. The bar graph indicates mean  $\pm$  SD (n = 3). \*, p<0.05. \*\*, p<0.01.

**Table S1.** Positive correlation between FOXC1 and chemokines in various breast tumor gene expression datasets.

| Accession number | CXCL1   |          | CXCL2   |          | CXCL8   |          | CCL20   |          | Sample size | Publication               | PMID     |
|------------------|---------|----------|---------|----------|---------|----------|---------|----------|-------------|---------------------------|----------|
|                  | r-value | p-value  | r-value | p-value  | r-value | p-value  | r-value | p-value  |             |                           |          |
| GSE21653         | 0.447   | 1.80E-14 | 0.387   | 5.90E-11 | 0.342   | 9.80E-09 | 0.437   | 8.40E-14 | 266         | Sabatier et al., 2011     | 20490655 |
| GSE3494          | 0.458   | 2.20E-14 | 0.338   | 4.10E-08 | 0.269   | 1.50E-05 | 0.29    | 3.00E-06 | 251         | Miller et al., 2005       | 16141321 |
| GSE2034          | 0.397   | 3.10E-12 | 0.353   | 7.80E-10 | 0.247   | 2.30E-05 | 0.381   | 2.70E-11 | 286         | Wang et al., 2005         | 15721472 |
| GSE12276         | 0.438   | 5.70E-11 | 0.399   | 3.40E-09 | 0.2     | 4.10E-03 | 0.43    | 1.40E-10 | 204         | Bos et al., 2009          | 19421193 |
| GSE25066         | 0.283   | 8.20E-11 | 0.291   | 2.10E-11 | 0.232   | 1.30E-07 | 0.267   | 9.40E-10 | 508         | Hatzis et al., 2011       | 21558518 |
| GSE36771         | 0.559   | 3.90E-10 | 0.373   | 7.50E-05 | 0.401   | 1.90E-05 | 0.374   | 7.20E-05 | 107         | Caldon et al., 2012       | 22564725 |
| GSE2109          | 0.253   | 1.60E-06 | 0.199   | 1.80E-04 | 0.227   | 1.80E-05 | 0.232   | 1.10E-05 | 351         | EXPO                      |          |
| GSE1456          | 0.36    | 3.20E-06 | 0.248   | 1.60E-03 | 0.15    | 0.06     | 0.239   | 2.40E-03 | 159         | Pawitan et al., 2005      | 16280042 |
| GSE28844         | 0.468   | 1.40E-04 | 0.564   | 2.20E-06 | 0.34    | 7.40E-03 | 0.24    | 0.06     | 61          | Vera-Ramirez et al., 2013 | 23326553 |
| GSE7390          | 0.256   | 2.70E-04 | 0.313   | 7.10E-06 | 0.168   | 0.02     | 0.247   | 4.40E-04 | 198         | Desmedt et al., 2007      | 17545524 |
| GSE5462          | 0.327   | 3.40E-04 | 0.431   | 1.30E-06 | 0.284   | 2.00E-03 | 0.298   | 1.20E-03 | 116         | Miller et al., 2007       | 17885619 |
| GSE2603          | 0.327   | 1.10E-03 | 0.205   | 0.04     | 0.37    | 2.00E-04 | 0.302   | 2.80E-03 | 96          | Minn et al., 2005         | 16049480 |
| GSE42568         | 0.292   | 1.10E-03 | 0.263   | 3.60E-03 | 0.186   | 0.04     | 0.222   | 0.01     | 121         | Clarke et al., 2013       | 23740839 |
| GSE5460          | 0.264   | 3.20E-03 | 0.143   | 0.11     | 0.252   | 5.00E-03 | 0.352   | 6.50E-05 | 123         | Lu et al., 2008           | 18297396 |

Regression analysis was performed for the statistical analysis.

**Table S2.** The sequences of guide RNAs used in CRISPR-dCas9 knockout experiments.

| <i>Gene name</i>   | <i>Number</i> | <i>Guide RNA (gRNA) sequence</i> | <i>Accession number</i> |
|--------------------|---------------|----------------------------------|-------------------------|
| Human <i>CXCL1</i> | #1            | TCATCGAAAAGATGCTGAAC             | NM_001511.3             |
|                    | #2            | GGAGCAGCAGTGCCACTCGC             |                         |
|                    | #3            | GCCGCTGGCCGGCGCGCAGC             |                         |
| Human <i>CXCL2</i> | #1            | CGCAGGAGCCGGGGATTGCT             | NM_002089.3             |
|                    | #2            | CGCGCCGGCTGGCGGCCACC             |                         |
|                    | #3            | CAAGAACATCCAAAGTGTGA             |                         |
| Human <i>CXCL8</i> | #1            | CTAAGTTCTTTAGCACTCCT             | NM_000584.3             |
|                    | #2            | TGTAAACATGACTTCCAAGC             |                         |
|                    | #3            | GAACTGAGAGTGATTGAGAG             |                         |
| Human <i>CCL20</i> | #1            | TACCTTCTGATTCGCCGCAG             | NM_004591.2             |
|                    | #2            | AATATATTGTGCGTCTCCTC             |                         |
|                    | #3            | CAAACCTCTTGGTACAGCACA            |                         |
| Human <i>p65</i>   | #1            | GCTTCCGCTACAAGTGCGAG             | NM_021975.3             |
|                    | #2            | AGCGCCCCTCGCACTTGTAG             |                         |
|                    | #3            | CAAGTGCGAGGGGCGCTCCG             |                         |
| Mouse <i>Hmgcr</i> | #1            | CCGGATGCATGGCCTCTTCG             | NM_008255.2             |
|                    | #2            | TCAAGACTTTTCCGGATGCA             |                         |
|                    | #3            | CCACGAAGAGGCCATGCATC             |                         |

**Table S3.** The primers used in the real-time PCR assays.

| <i>Gene name</i>     | <i>Sequence</i> |                          | <i>Accession number</i> |
|----------------------|-----------------|--------------------------|-------------------------|
| Human <i>CXCL1</i>   | Forward         | AGGCAGGGGAATGTATGTGC     | NM_001511.3             |
|                      | Reverse         | AGCCCCTTTGTTCTAAGCCA     |                         |
| Human <i>CXCL2</i>   | Forward         | AGATCAATGTGACGGCAGGG     | NM_002089.3             |
|                      | Reverse         | TCTCTGCTCTAACACAGAGGGA   |                         |
| Human <i>CXCL8</i>   | Forward         | GGTGCAGTTTTGCCAAGGAG     | NM_000584.3             |
|                      | Reverse         | TTCCTTGGGGTCCAGACAGA     |                         |
| Human <i>CXCL10</i>  | Forward         | ATATGGCACACTAGCCCCAC     | NM_001565.3             |
|                      | Reverse         | ATGCTGATGCAGGTACAGCG     |                         |
| Human <i>CCL20</i>   | Forward         | TGTCAGTGCTGCTACTCCAC     | NM_004591.2             |
|                      | Reverse         | ATTTGCGCACACAGACAACCT    |                         |
| Human <i>CCL2</i>    | Forward         | ACCTGGACAAGCAAACCCAA     | NM_002982.3             |
|                      | Reverse         | AGGGTGTCTGGGGAAAGCTA     |                         |
| Human <i>CCL7</i>    | Forward         | GAGATCTGTGCTGACCCAC      | NM_006273.3             |
|                      | Reverse         | CCACTCTGAGAAAGGACAGGG    |                         |
| Human <i>HMGCS1</i>  | Forward         | GTCACGCTTGTGCCCGAA       | NM_001098272.2          |
|                      | Reverse         | CTGGCCCAAGCCAATGGTAT     |                         |
| Human <i>MSMO1</i>   | Forward         | TTCCGAGGTTGGAACACCTGG    | NM_006745.4             |
|                      | Reverse         | TGCAGAGGATTCTCAGGTAAAAGT |                         |
| Human <i>SC5D</i>    | Forward         | GCTAGGACAGTTTGCAGAGC     | NM_006918.4             |
|                      | Reverse         | TAGCTCAGTGTTGCACAGAAGA   |                         |
| Human <i>SQLE</i>    | Forward         | CGTGCTGGTGTTCCTCTCG      | NM_003129.3             |
|                      | Reverse         | TTGGTTCCTTTTCTGCGCCTC    |                         |
| Human <i>ID11</i>    | Forward         | GGGACCGGCGGTTGTC         | NM_004508.2             |
|                      | Reverse         | AAAGCTCGATGCAATAATCCTTTC |                         |
| Human <i>CYP51A1</i> | Forward         | GACCTCGGCCTTCAGTGTTT     | NM_000786.3             |
|                      | Reverse         | GGAGGACTTTTCACCCCTGC     |                         |
| Human <i>NSDHL</i>   | Forward         | CGCCTACGGACGGAAAAGAAA    | NM_015922.2             |
|                      | Reverse         | CACTGTGCATCTCTTGGCCT     |                         |
| Human <i>DHCR7</i>   | Forward         | AAGCGAGGCCAGGGGAA        | NM_001360.2             |
|                      | Reverse         | TGGCTTTGGGAATGTTGGGT     |                         |
| Human <i>HSD17B7</i> | Forward         | TCATCTCGCAGTGCAAGGAA     | NM_016371.2             |
|                      | Reverse         | GAGACCCTGCTGGTTGAAGT     |                         |
| Human <i>HMGCR</i>   | Forward         | TCTTATTGGTTCGAAGGCTCGT   | NM_000859.2             |
|                      | Reverse         | TCTCACTAGAGGCCACCGAA     |                         |
| Human <i>MVD</i>     | Forward         | ATCAAGTACTGGGGCAAGCG     | NM_002461.1             |
|                      | Reverse         | CAAATCCGGTCCTCGGTGAA     |                         |
| Human <i>FDFT1</i>   | Forward         | AAGGGGCAGTGAAGATTCGG     | NM_004462.3             |
|                      | Reverse         | AACGACAGGTAGATGGGGGA     |                         |
| Human <i>MVK</i>     | Forward         | TTCCCAGGAGCCATGTTGTC     | NM_000431.2             |
|                      | Reverse         | TGGGTAAGCTGAGGTCCACT     |                         |
| Human <i>ABCA1</i>   | Forward         | GCTCTCAGACCTGGGCATTT     | NM_005502.4             |
|                      | Reverse         | CCTTTGCCATCCATCCCACT     |                         |

|                    |         |                       |             |
|--------------------|---------|-----------------------|-------------|
| Human <i>LDLR</i>  | Forward | CAGCTACCCCTCGAGACAGA  | NM_000527.5 |
|                    | Reverse | CACTGTCCGAAGCCTGTTCT  |             |
| Human <i>GAPDH</i> | Forward | ATGGGTGTGAACCATGAGAA  | NM_002046.4 |
|                    | Reverse | GTGCTAAGCAGTTGGTGGTG  |             |
| Mouse <i>Mgp</i>   | Forward | GGCGAGCTAAAGCCCAAAG   | NM_008597.3 |
|                    | Reverse | AAGTAGCGGTTGTAGGCAGC  |             |
| Mouse <i>Saa3</i>  | Forward | AGCCAAAGATGGGTCCAGTT  | NM_011315.3 |
|                    | Reverse | ATAGTTCCCCCGAGCATGGA  |             |
| Mouse <i>Ccl2</i>  | Forward | CAGGTCCCTGTCATGCTTCT  | NM_011333.3 |
|                    | Reverse | CCCATTCCTTCTTGGGGTCA  |             |
| Mouse <i>Egfl7</i> | Forward | AGTTCAGTGGTGAGGGGTCC  | NM_178444.4 |
|                    | Reverse | TGGTCTGCATCTGTAAGTGGG |             |
| Mouse <i>Ccl7</i>  | Forward | GATCTCTGCCACGCTTCTGT  | NM_013654.3 |
|                    | Reverse | ATAGCCTCCTCGACCCACTT  |             |
| Mouse <i>Gapdh</i> | Forward | TGTGAACGGATTTGGCCGTA  | BC096042.1  |
|                    | Reverse | AGATGCCTGCTTCCCATTTCT |             |
